# Supplementary material for: Defining Key Deprescribing Measures from Electronic Health Data: A Multisite Data Harmonization Project
Source: bioRxiv or medRxiv preprint supplement (doi:10.1101/2023.11.06.23298060), 2023-11-07

Appendix Figure 1a: Illustration of Fixed Time Point Definition of Discontinuation, Without Halo

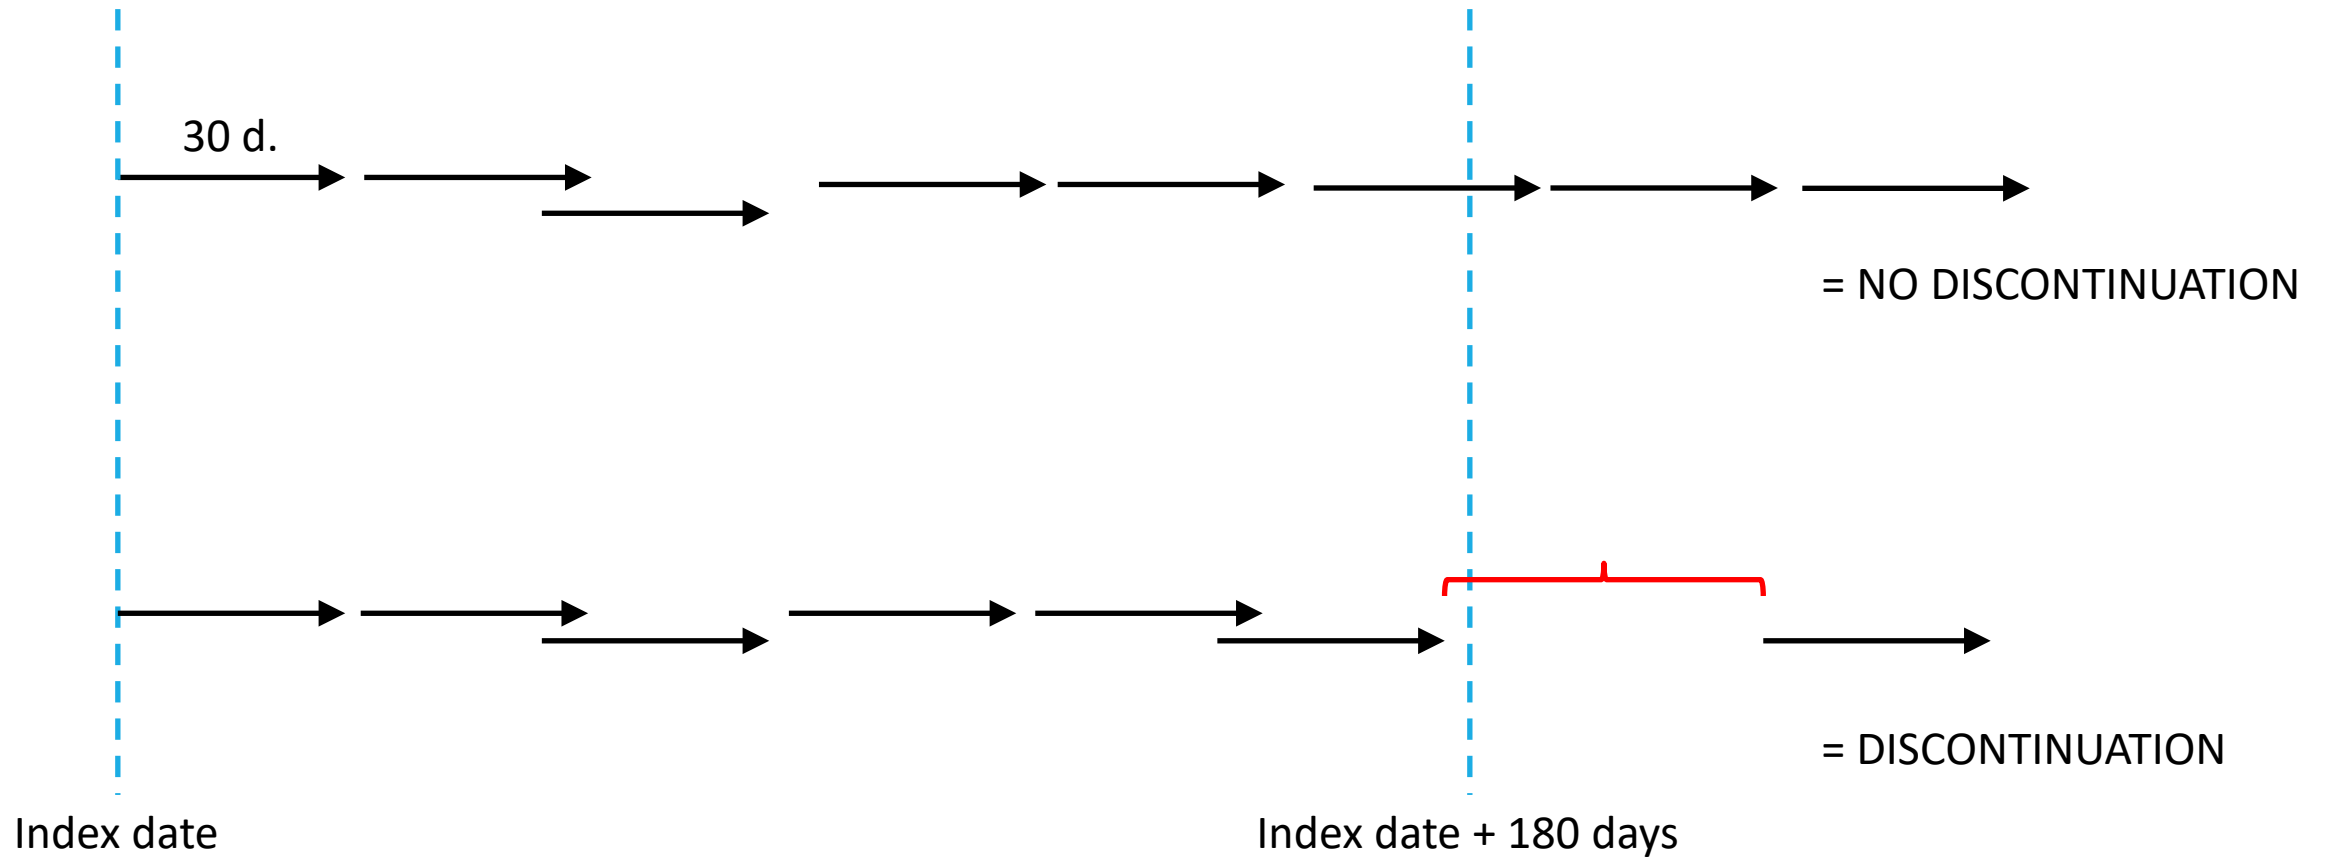

Appendix Figure 1b: Illustration of Fixed Time Point Definition of Discontinuation, With Halo

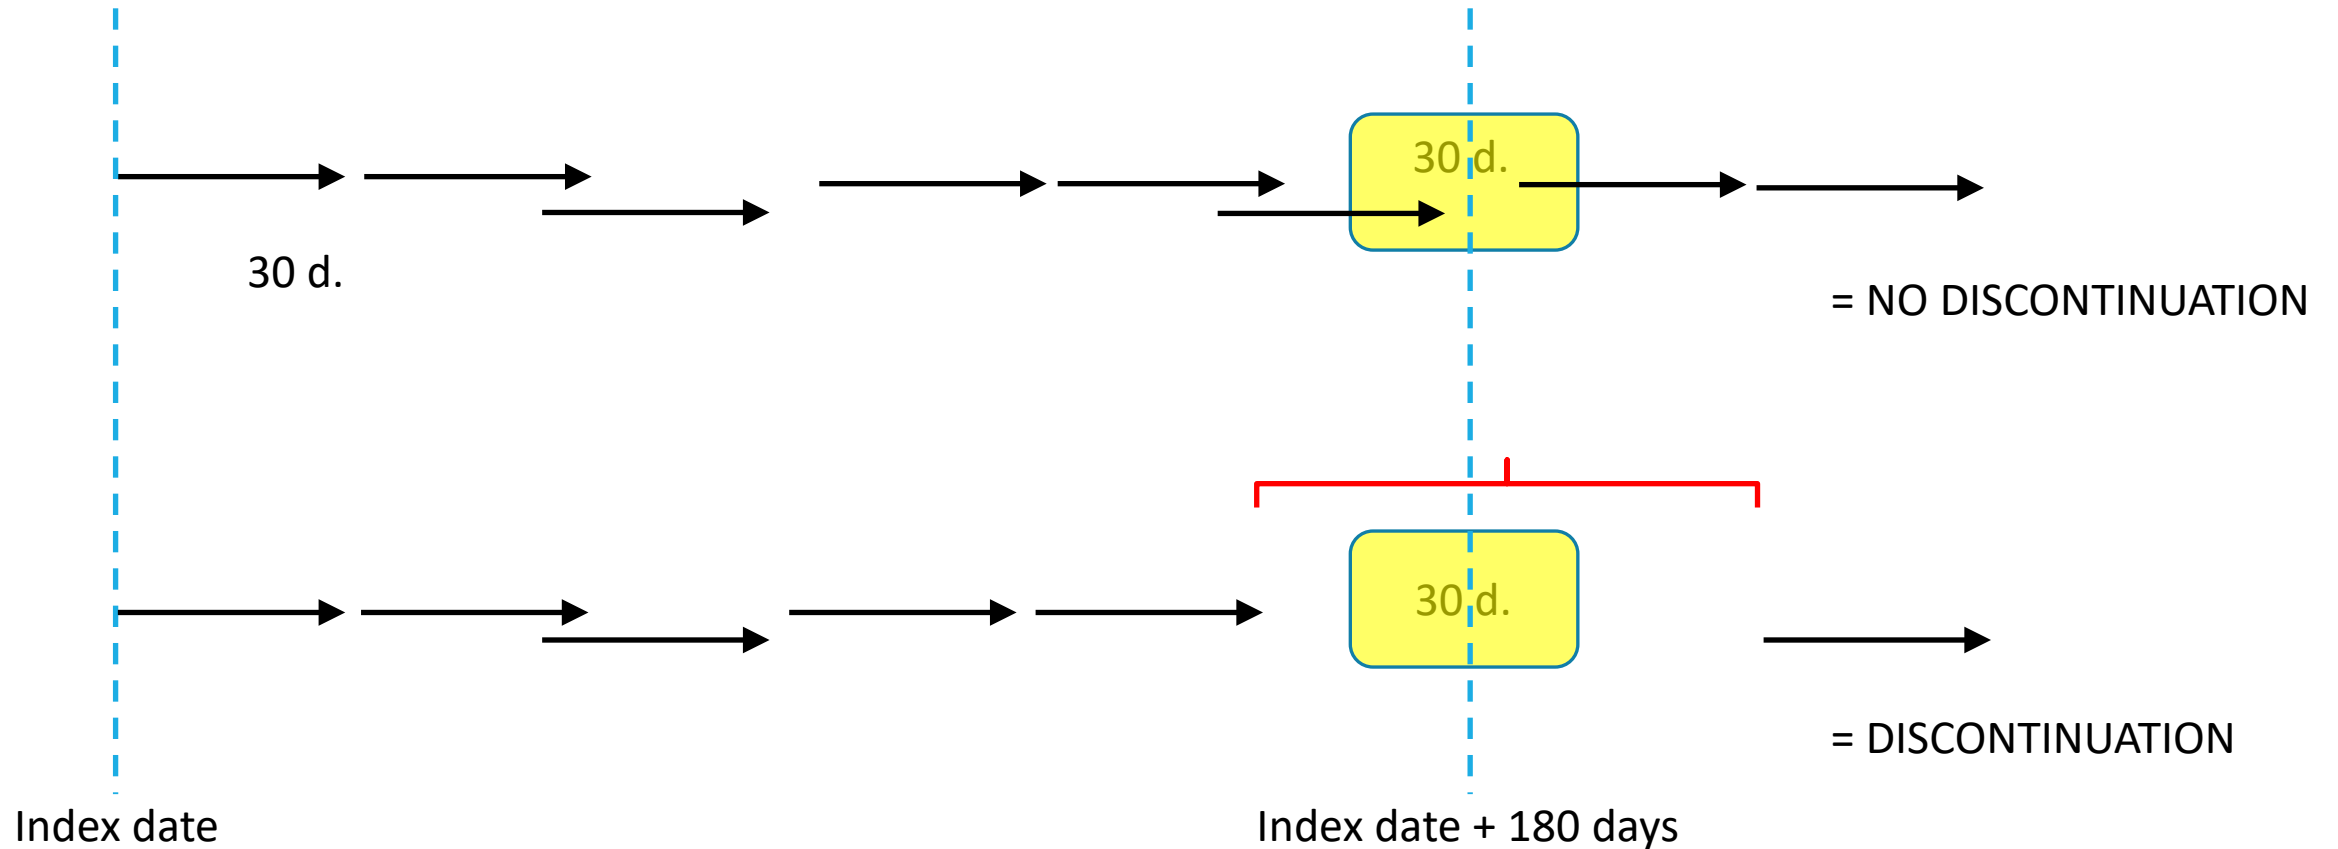

In the top row, representing no discontinuation, there are dispensings or orders within the 30-day halo period around the fixed point. In the bottom line, representing discontinuation, there are no dispensings or orders within the 30-day halo period around the fixed point. Note: the 30-day period does not have to be symmetric around the fixed point; it represents any 30-day period that contains the fixed point within it.

Appendix Figure 2: Prevalence of Benzodiazepine and Z-drug Use in People Aged  $\geq 65$  within 5 U.S. Healthcare Systems, 2018

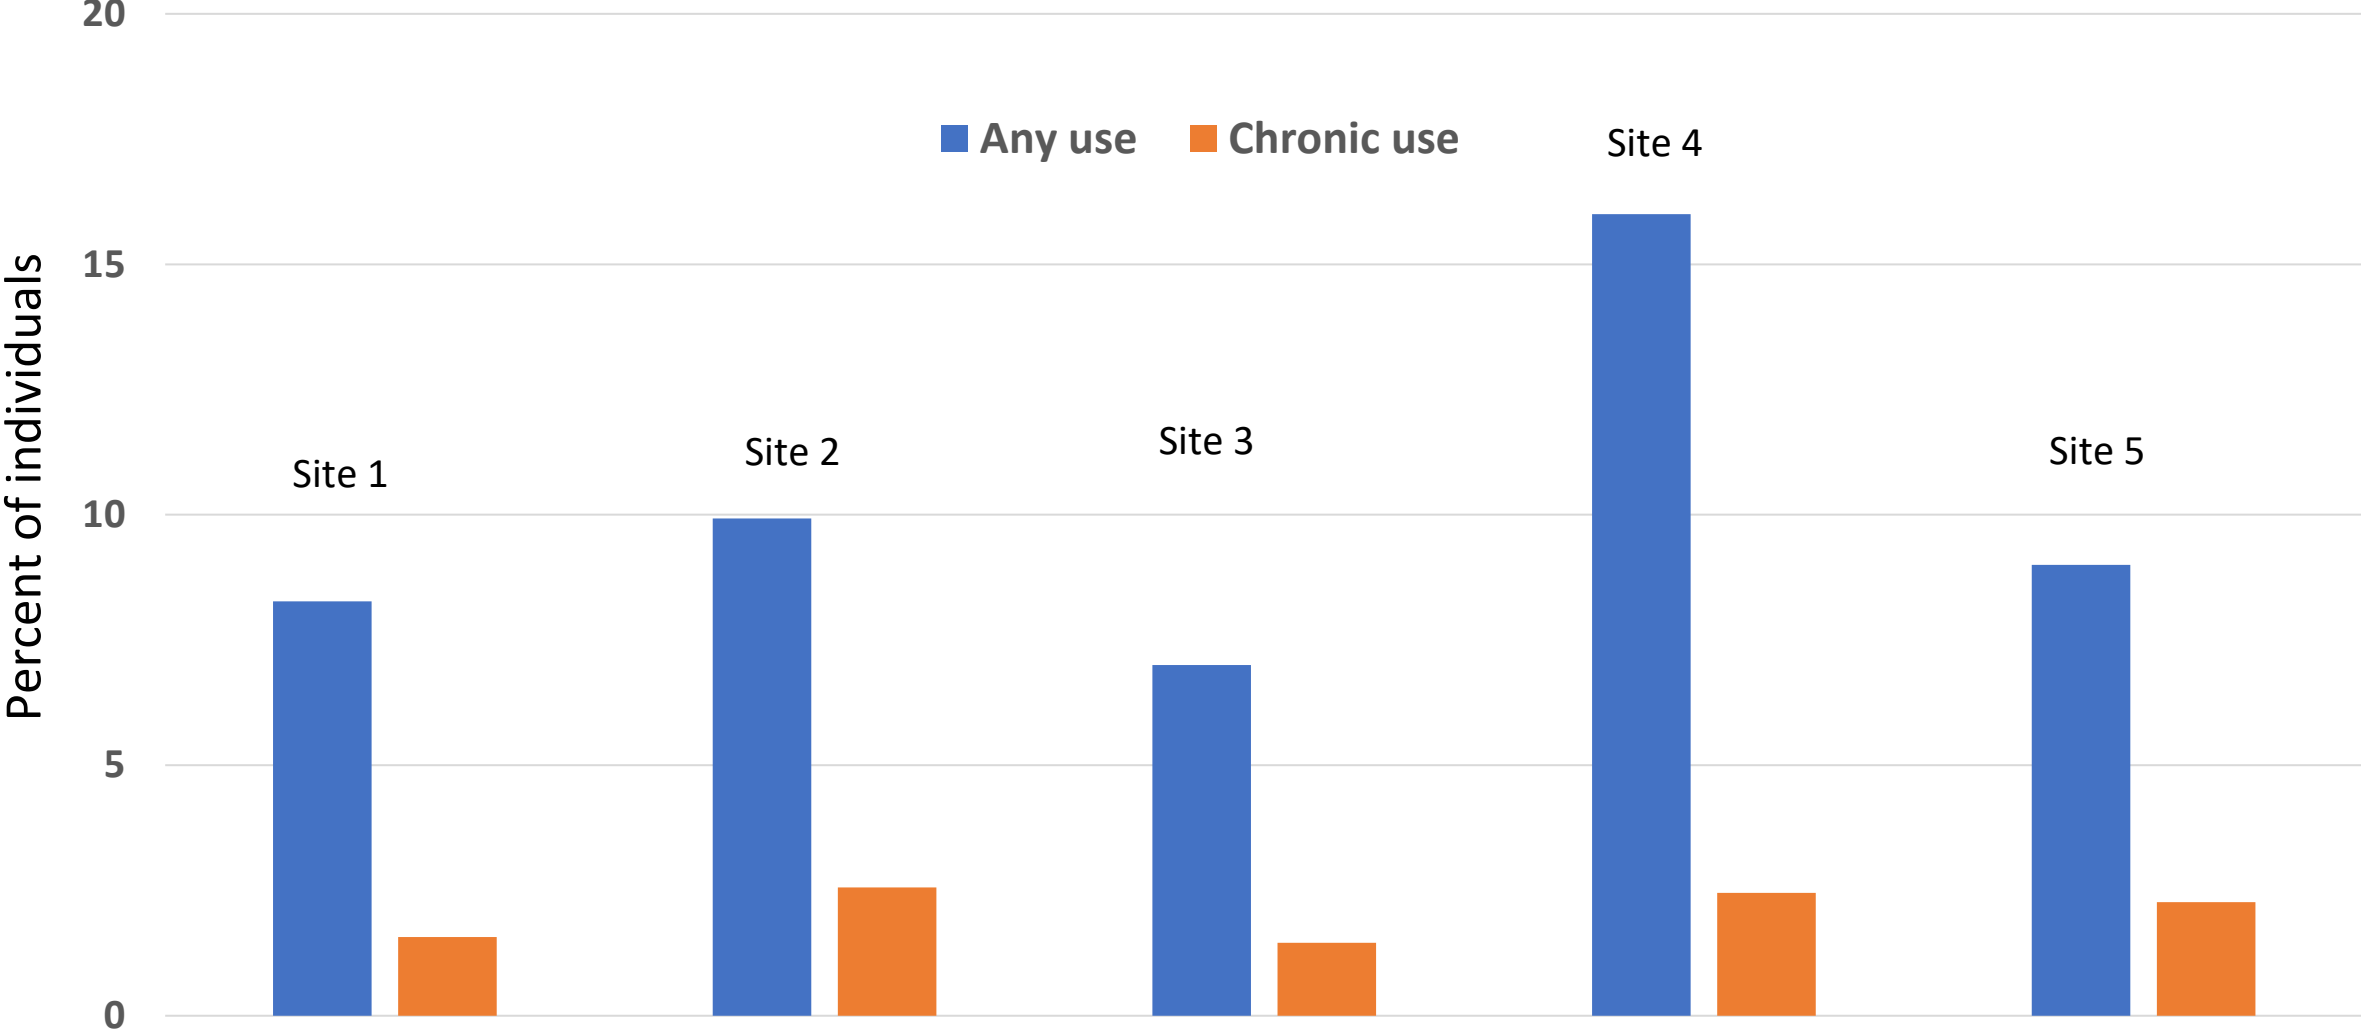

Appendix Figure 3a: Results of Applying Inclusion and Exclusion Criteria, KPWA

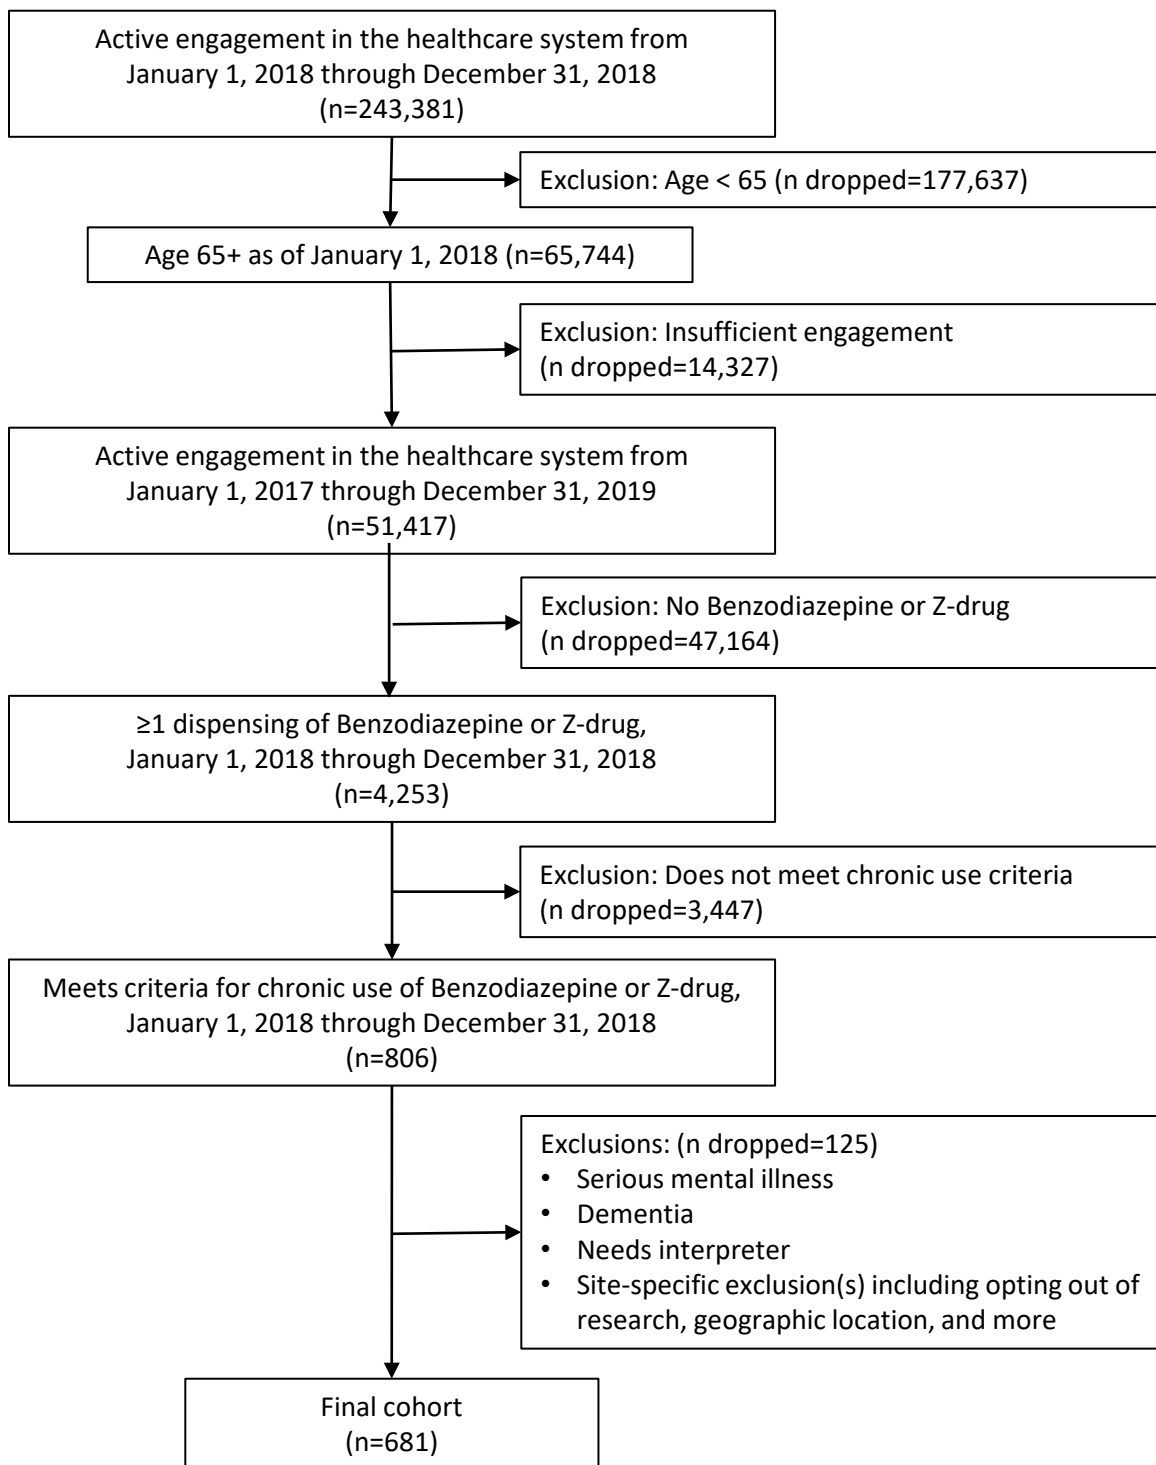

# Appendix Figure 3b: Results of Applying Inclusion and Exclusion Criteria, KPCO

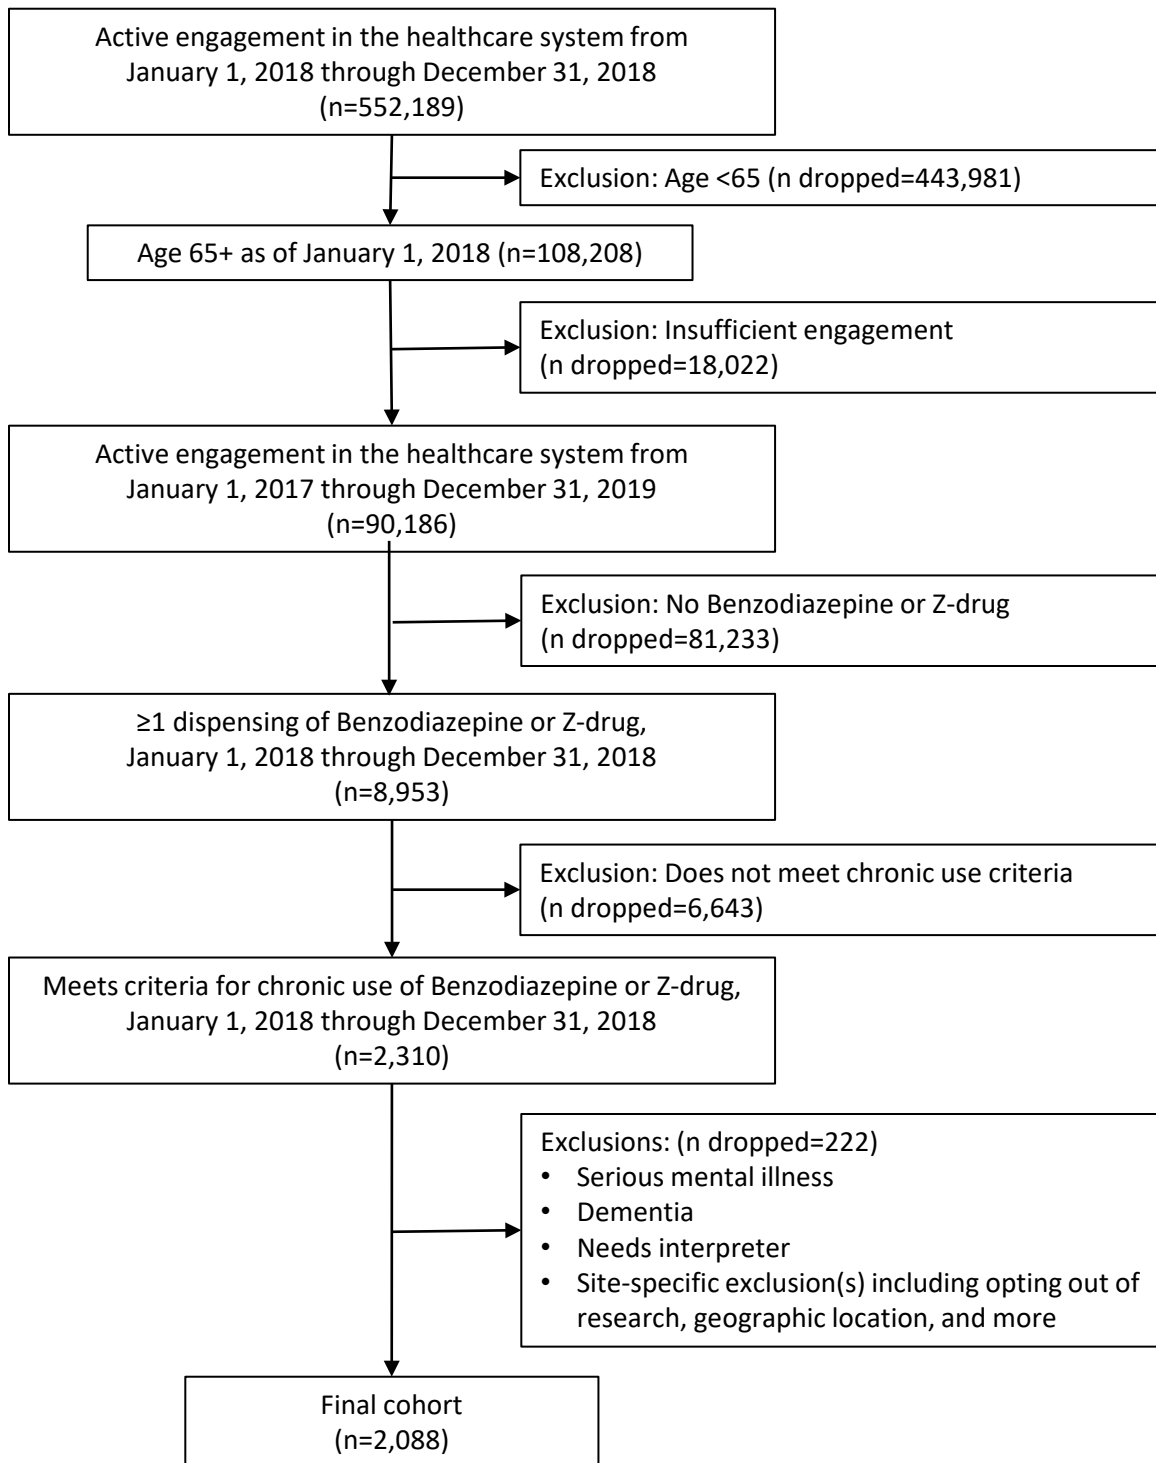

Appendix Figure 3c: Results of Applying Inclusion and Exclusion Criteria, Duke

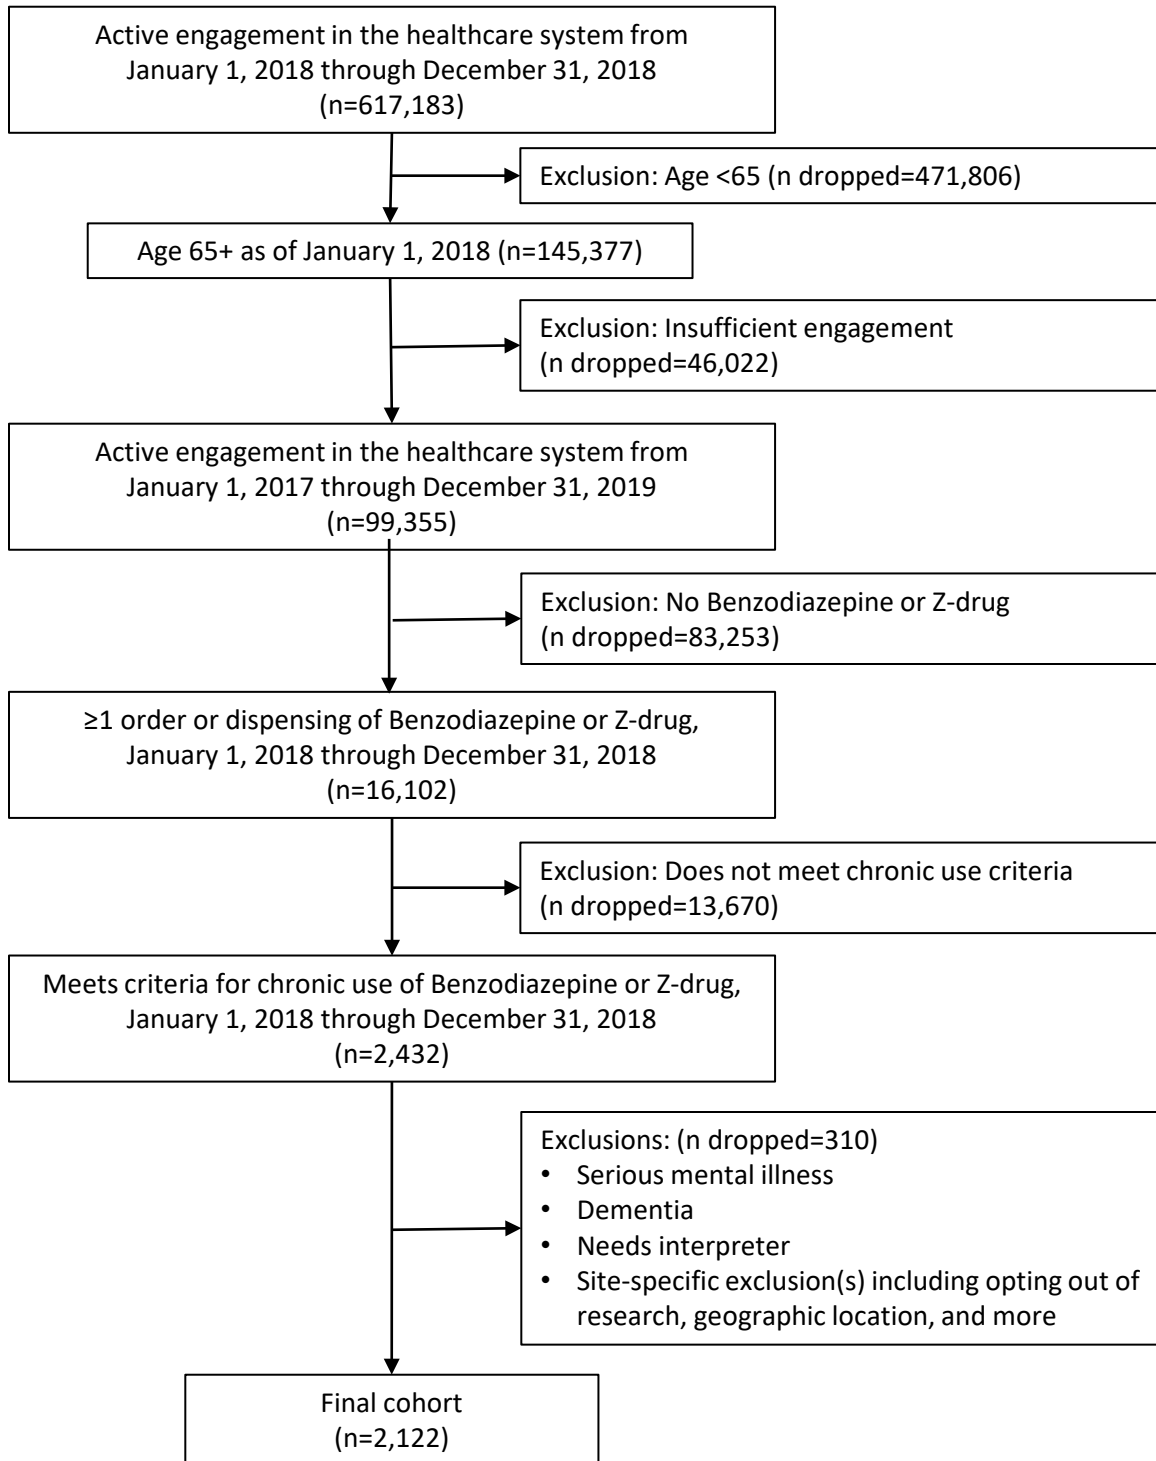

Appendix Figure 3d: Results of Applying Inclusion and Exclusion Criteria, Durham VA

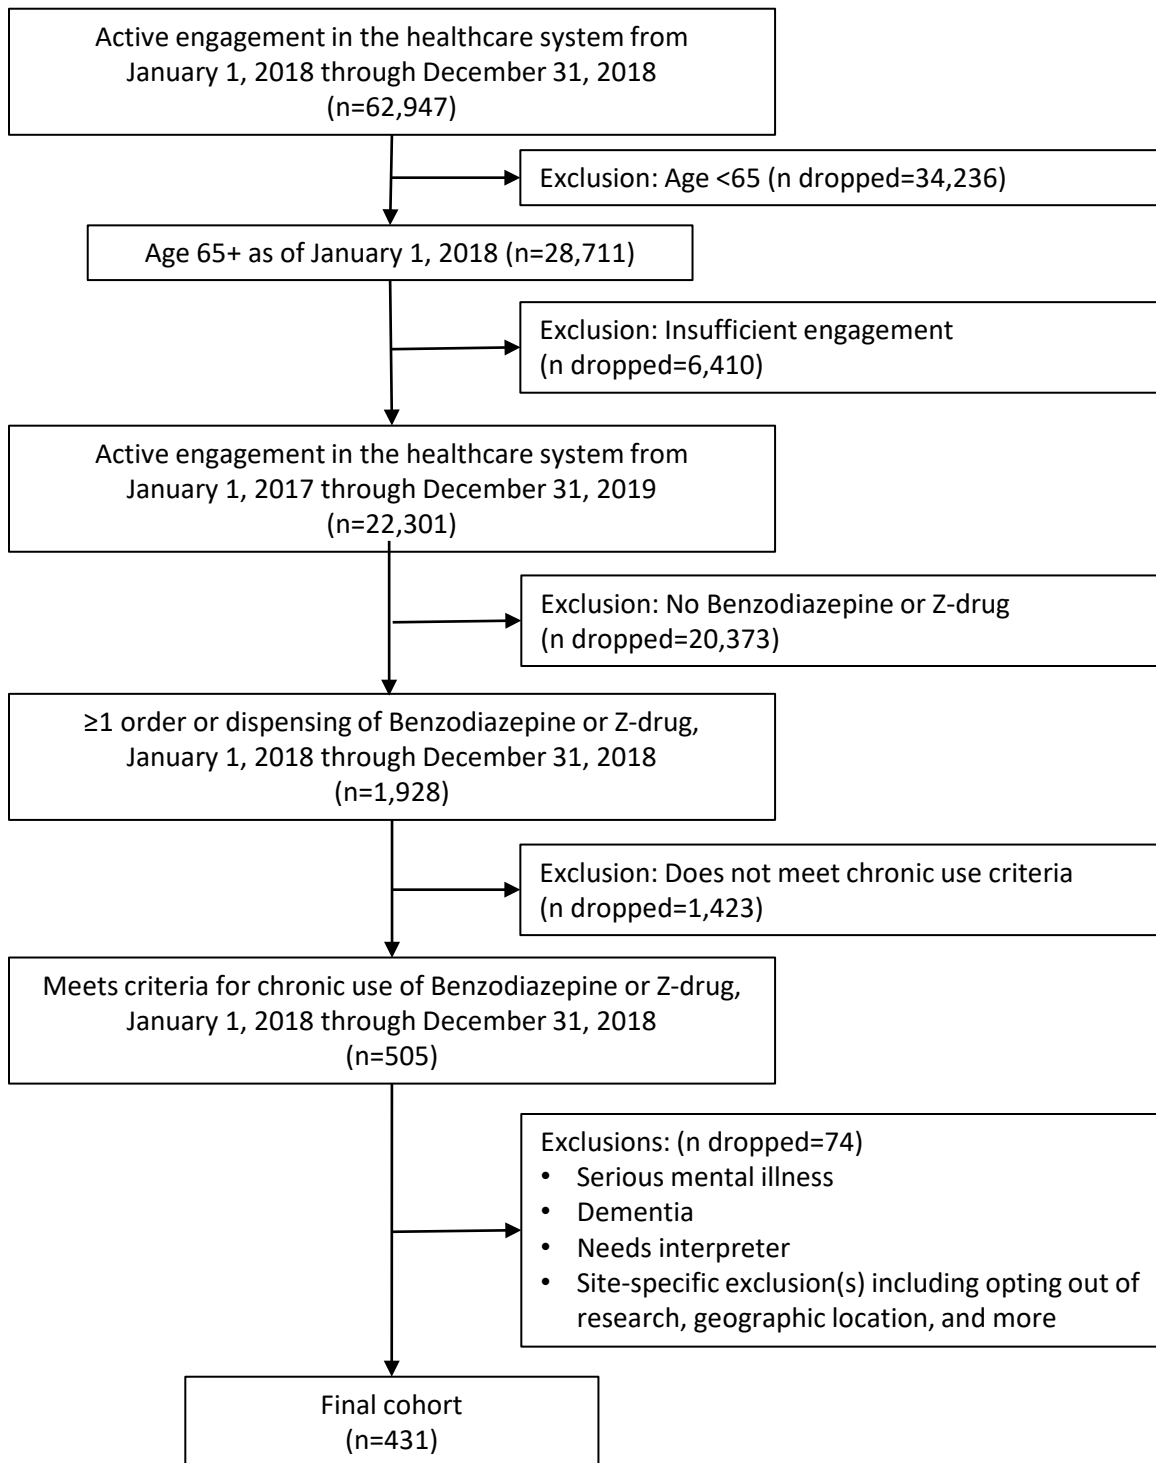

# Appendix Figure 3e: Results of Applying Inclusion and Exclusion Criteria, Penn

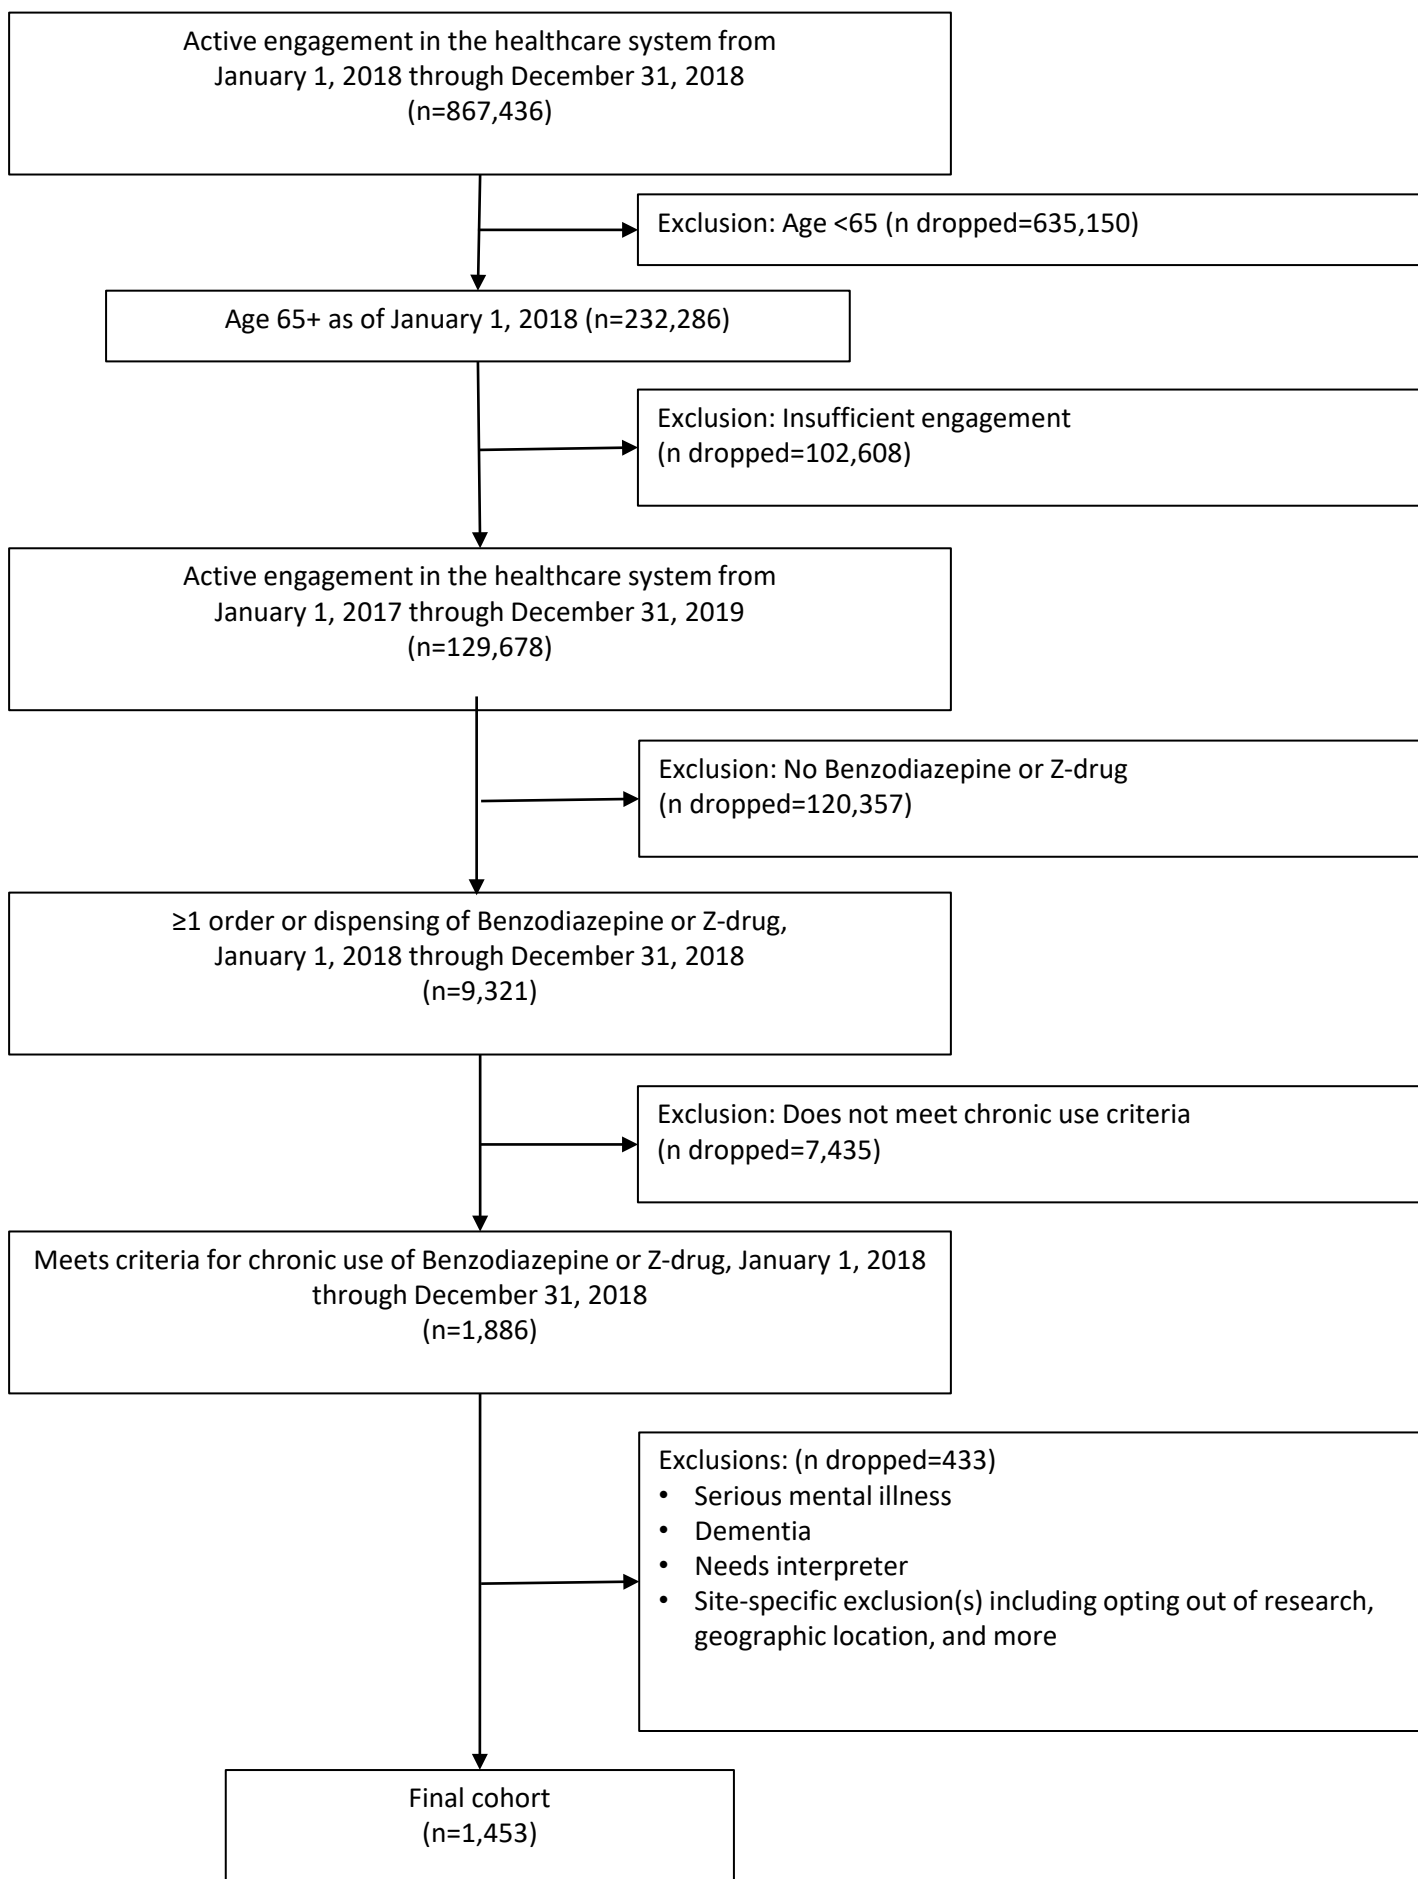



Appendix Figure 4: Impact of Adjusting for Medication Stockpiling on Estimated Discontinuation Rates (Using Gap-Based Definition)

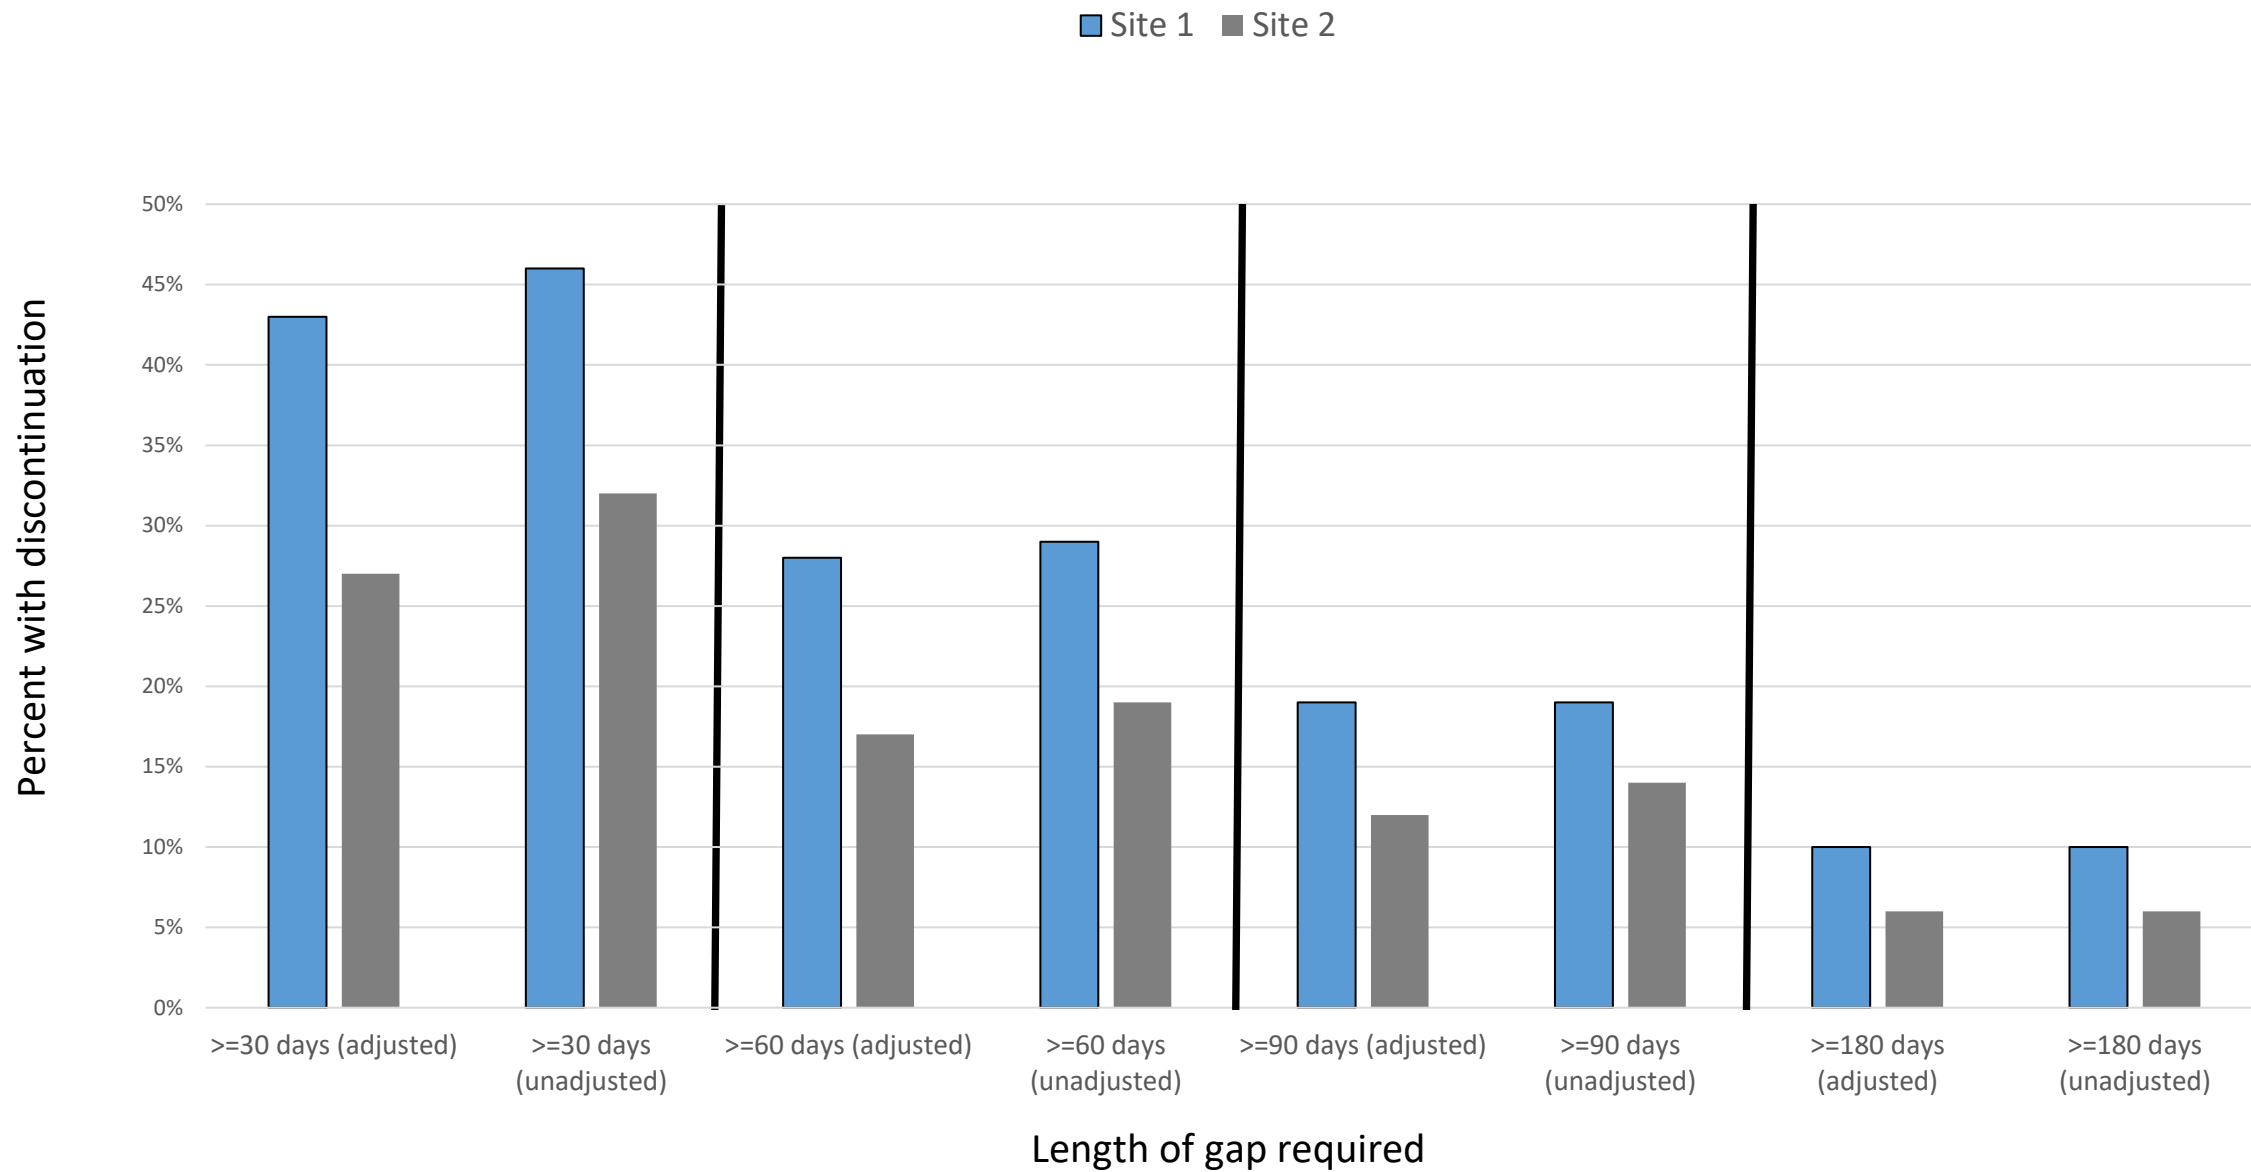

Supplement: Supplementary file [file media-3.pdf]
